# Supplementary material for: Synthesis and application of novel urea–benzoic acid functionalized magnetic nanoparticles for the synthesis of 2,3-disubstituted thiazolidin-4-ones and hexahydroquinolines
Source: Royal Society of Chemistry journal article supplement (doi:10.1039/d2ra02205b), 2022-01-01

## Synthesis and application of novel urea-benzoic acid functionalized magnetic nanoparticles for the synthesis of 2,3-disubstituted thiazolidin-4-ones and hexahydroquinolines

Fazlollah Fazl, Morteza Torabi, Meysam Yarie,\* Mohammad Ali Zolfigol

Department of Organic Chemistry, Faculty of Chemistry, Bu-Ali Sina University, Hamedan, Iran.

Correspondence: Meysam Yarie, Email: myarie.5266@gmail.com

- 1: FT-IR spectrum of 4-(3-(3-(triethoxysilyl)propyl)ureido)benzoic acid.
- 2: <sup>1</sup>H NMR spectrum of 4-(3-(3-(triethoxysilyl)propyl)ureido)benzoic acid.
- 3: <sup>13</sup>C NMR spectrum of 4-(3-(3-(triethoxysilyl)propyl)ureido)benzoic acid.
- 4: FT-IR spectrum of 3-(benzo[*d*]thiazol-2-yl)-2-phenylthiazolidin-4-one.
- 5: <sup>1</sup>H NMR spectrum of 3-(benzo[*d*]thiazol-2-yl)-2-phenylthiazolidin-4-one.
- 6: <sup>13</sup>C NMR spectrum of 3-(benzo[*d*]thiazol-2-yl)-2-phenylthiazolidin-4-one.
- 7: FT-IR spectrum of 3-(benzo[*d*]thiazol-2-yl)-2-(4-chlorophenyl)thiazolidin-4-one.
- 8: <sup>1</sup>H NMR spectrum of 3-(benzo[*d*]thiazol-2-yl)-2-(4-chlorophenyl)thiazolidin-4-one.
- 9: <sup>13</sup>C NMR spectrum of 3-(benzo[*d*]thiazol-2-yl)-2-(4-chlorophenyl)thiazolidin-4-one.
- 10: FT-IR spectrum of 3-(benzo[*d*]thiazol-2-yl)-2-(2-chlorophenyl)thiazolidin-4-one.
- 11: <sup>1</sup>H NMR spectrum of 3-(benzo[*d*]thiazol-2-yl)-2-(2-chlorophenyl)thiazolidin-4-one.
- 12: <sup>13</sup>C NMR spectrum of 3-(benzo[*d*]thiazol-2-yl)-2-(2-chlorophenyl)thiazolidin-4-one.
- 13: FT-IR spectrum of 3-(benzo[*d*]thiazol-2-yl)-2-(4-bromophenyl)thiazolidin-4-one.
- 14: FT-IR spectrum of 3-(benzo[*d*]thiazol-2-yl)-2-(4-nitrophenyl)thiazolidin-4-one.
- 15: FT-IR spectrum of 3-(benzo[*d*]thiazol-2-yl)-2-(*p*-tolyl)thiazolidin-4-one.
- 16: FT-IR spectrum of 3-(benzo[*d*]thiazol-2-yl)-2-(2-hydroxyphenyl)thiazolidin-4-one.
- 17: FT-IR spectrum of 3,3'-(1,4-phenylene)bis(2-phenylthiazolidin-4-one).
- 18: FT-IR spectrum of 3,3'-(ethane-1,2-diyl)bis(2-phenylthiazolidin-4-one).
- 19: <sup>1</sup>H NMR spectrum of 3,3'-(ethane-1,2-diyl)bis(2-phenylthiazolidin-4-one).
- 20: <sup>13</sup>C NMR spectrum of 3,3'-(ethane-1,2-diyl)bis(2-phenylthiazolidin-4-one).
- 21: FT-IR spectrum of 3,3'-(ethane-1,2-diyl)bis(2-(4-chlorophenyl)thiazolidin-4-one).
- 22: FT-IR spectrum of 3,3'-(ethane-1,2-diyl)bis(2-(4-methylphenyl)thiazolidin-4-one).

- 23: <sup>1</sup>H NMR spectrum of 3,3'-(ethane-1,2-diyl)bis(2-(4-methylphenyl)thiazolidin-4-one).
- 24: <sup>13</sup>C NMR spectrum of 3,3'-(ethane-1,2-diyl)bis(2-(*p*-tolyl phenyl)thiazolidin-4-one).
- 25: FT-IR spectrum of ethyl 2,7,7-trimethyl-5-oxo-4-phenyl-1,4,5,6,7,8-hexahydroquinoline-3-carboxylate.
- 26: <sup>1</sup>H NMR spectrum of 2,7,7-trimethyl-5-oxo-4-phenyl-1,4,5,6,7,8-hexahydroquinoline-3-carboxylate.
- 27: <sup>13</sup>C NMR spectrum of 2,7,7-trimethyl-5-oxo-4-phenyl-1,4,5,6,7,8-hexahydroquinoline-3-carboxylate.
- 28: FT-IR spectrum of ethyl 2,7,7-trimethyl-5-oxo-4-(*p*-tolyl)-1,4,5,6,7,8-hexahydroquinoline-3-carboxylate.
- 29: FT-IR spectrum of ethyl 4-(4-hydroxyphenyl)-2,7,7-trimethyl-5-oxo-1,4,5,6,7,8-hexahydroquinoline-3-carboxylate.
- 30: FT-IR spectrum of ethyl 4-(3-hydroxyphenyl)-2,7,7-trimethyl-5-oxo-1,4,5,6,7,8-hexahydroquinoline-3-carboxylate.
- 31: FT-IR spectrum of ethyl 4-(4-methoxyphenyl)-2,7,7-trimethyl-5-oxo-1,4,5,6,7,8-hexahydroquinoline-3-carboxylate.
- 32: <sup>1</sup>H NMR spectrum of ethyl 4-(4-methoxyphenyl)-2,7,7-trimethyl-5-oxo-1,4,5,6,7,8-hexahydroquinoline-3-carboxylate.
- 33: <sup>13</sup>C NMR spectrum of ethyl 4-(4-methoxyphenyl)-2,7,7-trimethyl-5-oxo-1,4,5,6,7,8-hexahydroquinoline-3-carboxylate.
- 34: <sup>1</sup>H NMR spectrum of ethyl 4-(4-chlorophenyl)-2,7,7-trimethyl-5-oxo-1,4,5,6,7,8-hexahydroquinoline-3-carboxylate.
- 35: <sup>13</sup>C NMR spectrum of 4-(4-chlorophenyl)-2,7,7-trimethyl-5-oxo-1,4,5,6,7,8-hexahydroquinoline-3-carboxylate.
- 36: FT-IR spectrum of 4-(2-chlorophenyl)-2,7,7-trimethyl-5-oxo-1,4,5,6,7,8-hexahydroquinoline-3-carboxylate.
- 37: FT-IR spectrum of ethyl 4-(2,4-dichlorophenyl)-2,7,7-trimethyl-5-oxo-1,4,5,6,7,8-hexahydroquinoline-3-carboxylate.
- 38: FT-IR spectrum of ethyl 2,7,7-trimethyl-5-oxo-4-(thiophen-2-yl)-1,4,5,6,7,8-hexahydroquinoline-3-carboxylate.
- 39: FT-IR spectrum of 4-(4-nitrophenyl)-2,7,7-trimethyl-5-oxo-1,4,5,6,7,8-hexahydroquinoline-3-carboxylate.

1: FT-IR spectrum of 4-(3-(3-(triethoxysilyl)propyl)ureido)benzoic acid.

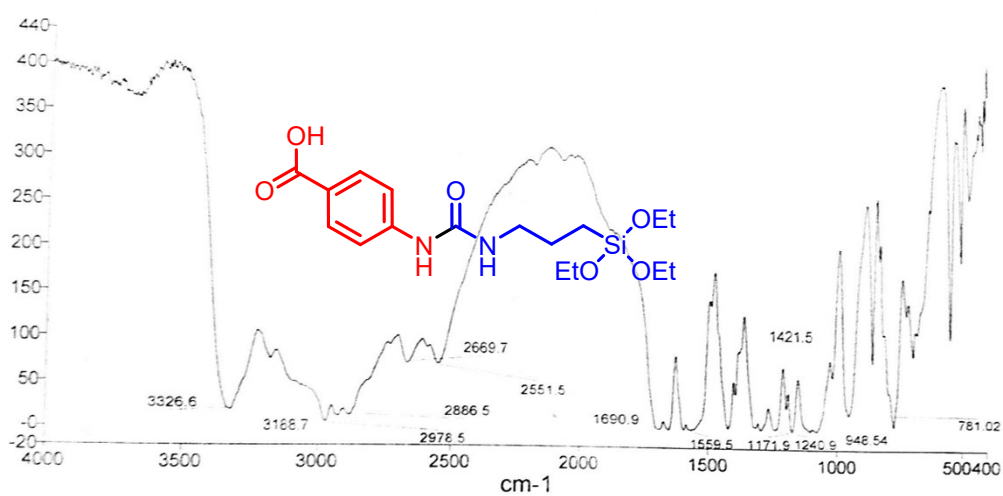

2: <sup>1</sup>H NMR spectrum of 4-(3-(3-(triethoxysilyl)propyl)ureido)benzoic acid.

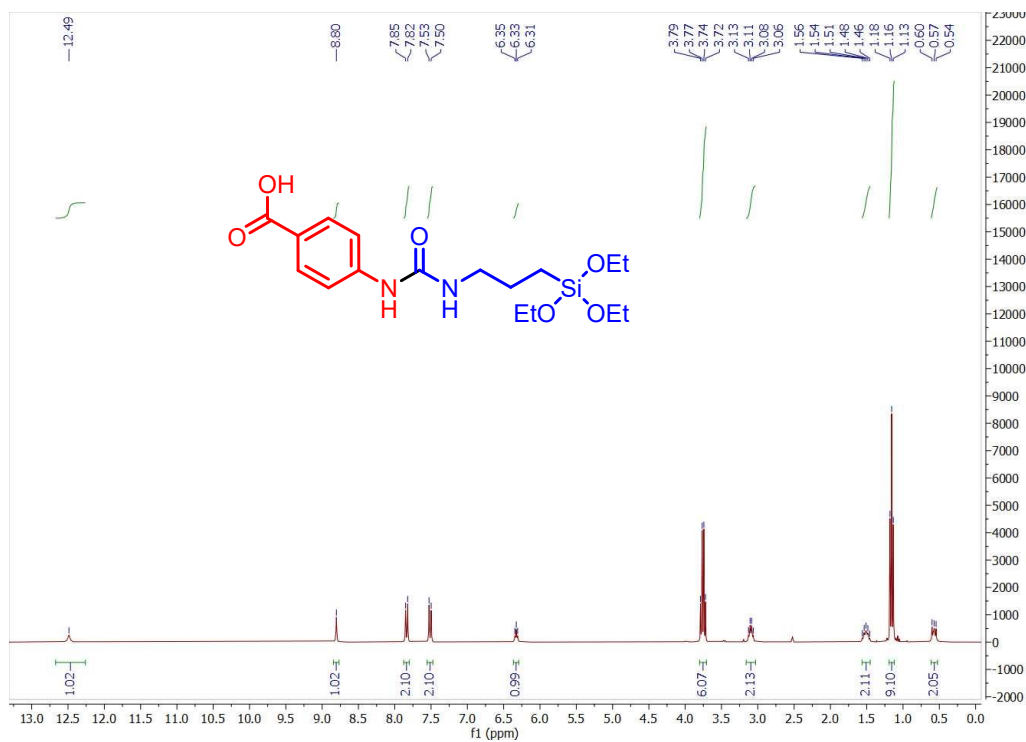

3:  $^{13}\text{C}$  NMR spectrum of 4-(3-(3-(triethoxysilyl)propyl)ureido)benzoic acid.

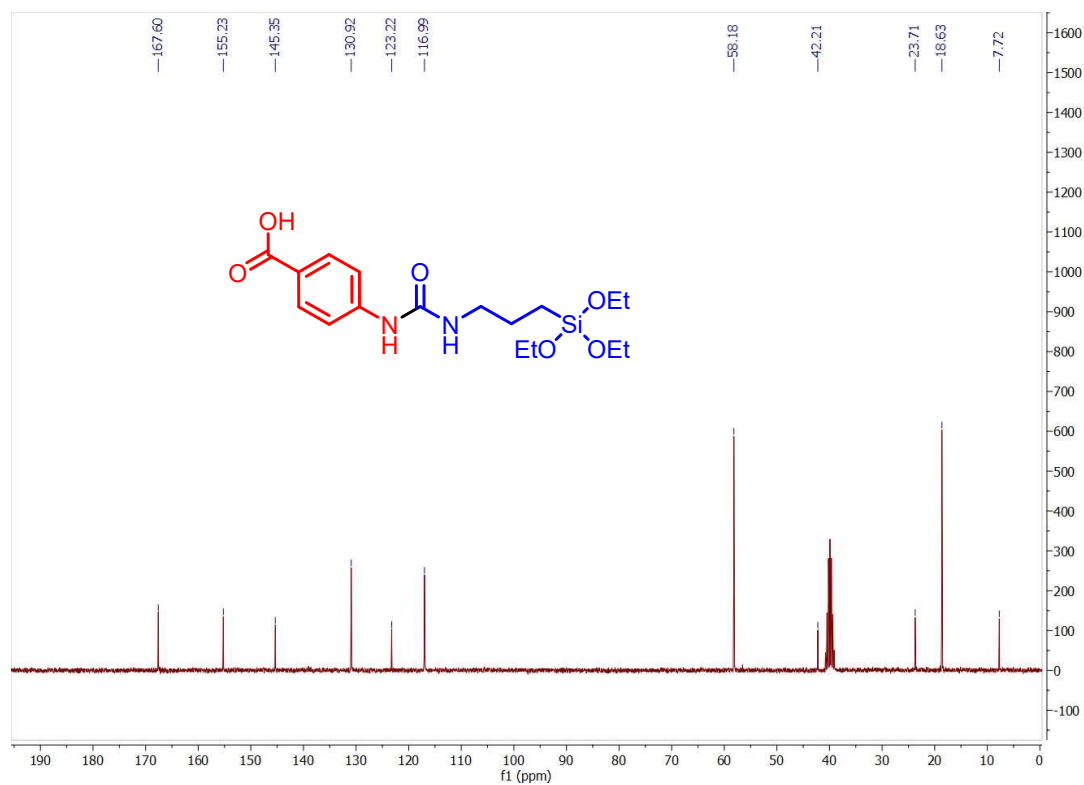

4: FT-IR spectrum of 3-(benzo[d]thiazol-2-yl)-2-phenylthiazolidin-4-one.

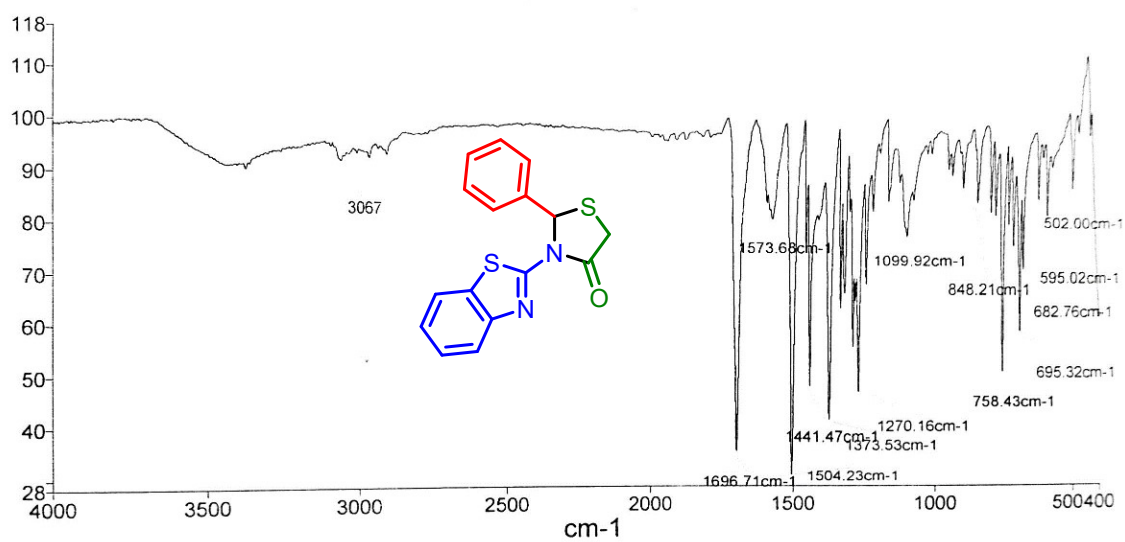

5:  $^1\text{H}$  NMR spectrum of 3-(benzo[*d*]thiazol-2-yl)-2-phenylthiazolidin-4-one.

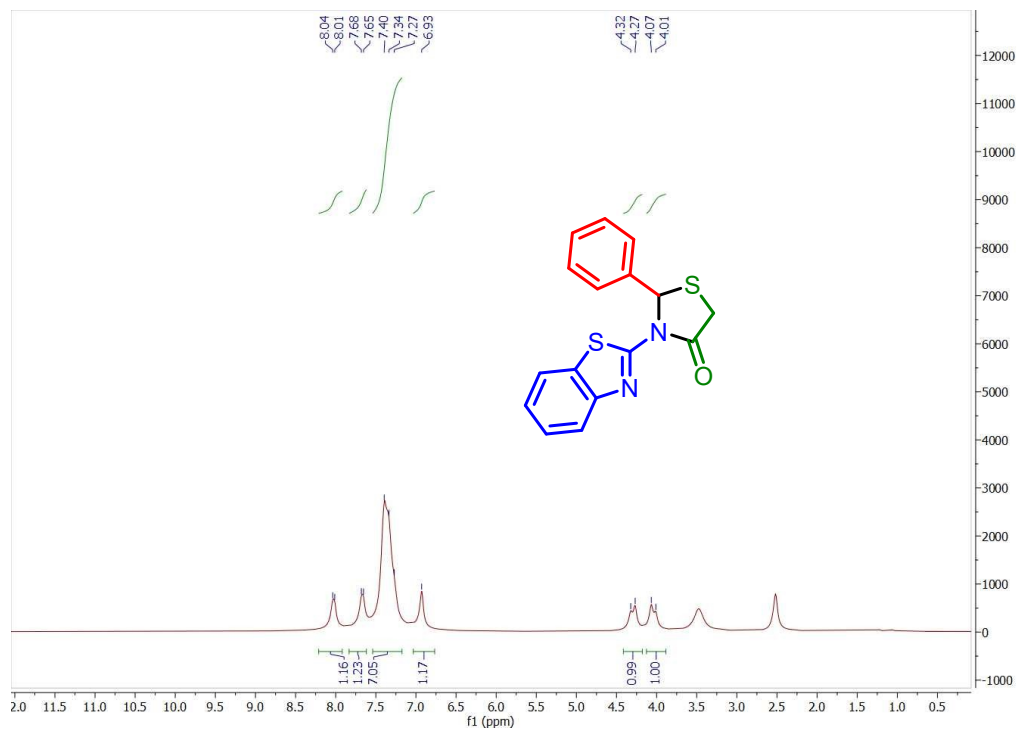

6:  $^{13}\text{C}$  NMR spectrum of 3-(benzo[*d*]thiazol-2-yl)-2-phenylthiazolidin-4-one.

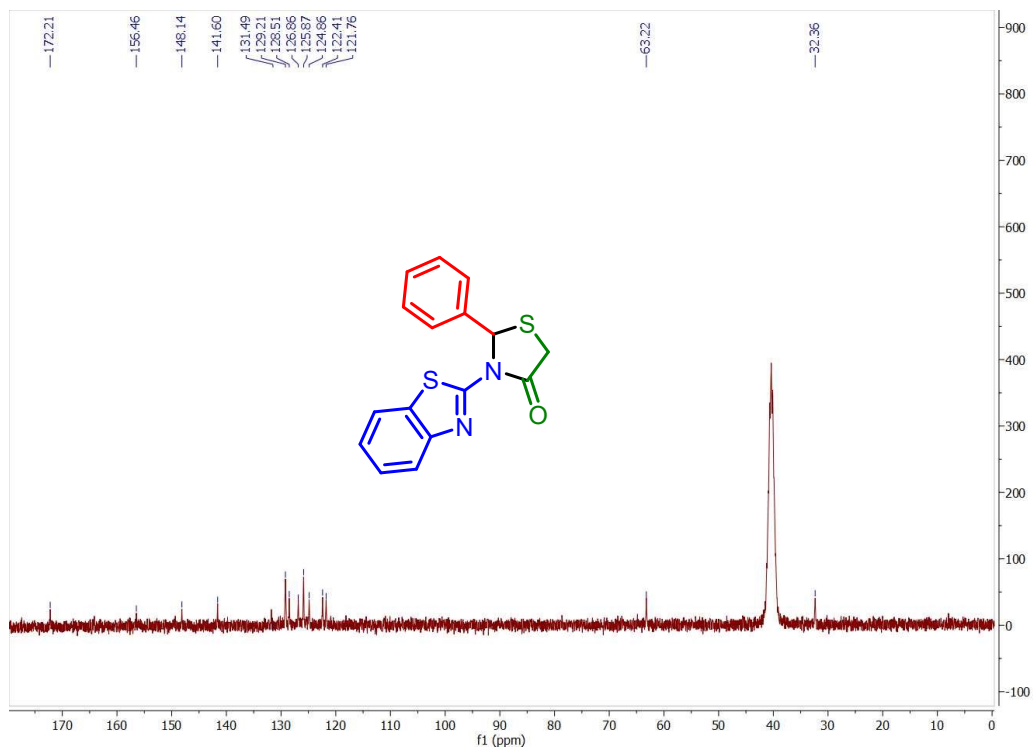

7: FT-IR spectrum of 3-(benzo[d]thiazol-2-yl)-2-(4-chlorophenyl)thiazolidin-4-one.

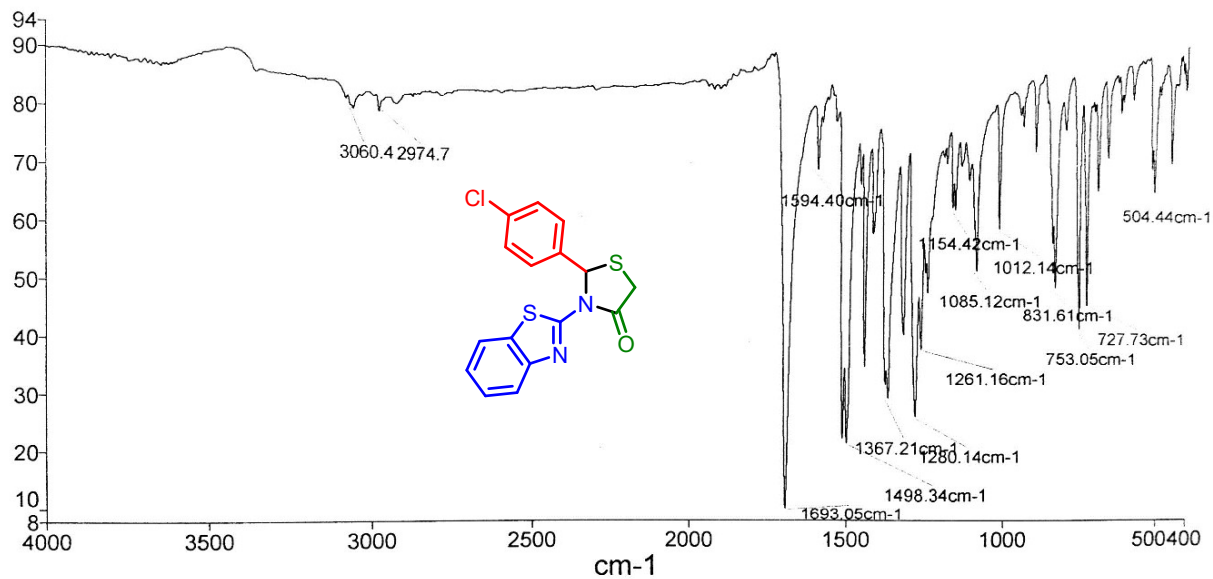

8: <sup>1</sup>H NMR spectrum of 3-(benzo[d]thiazol-2-yl)-2-(4-chlorophenyl)thiazolidin-4-one.

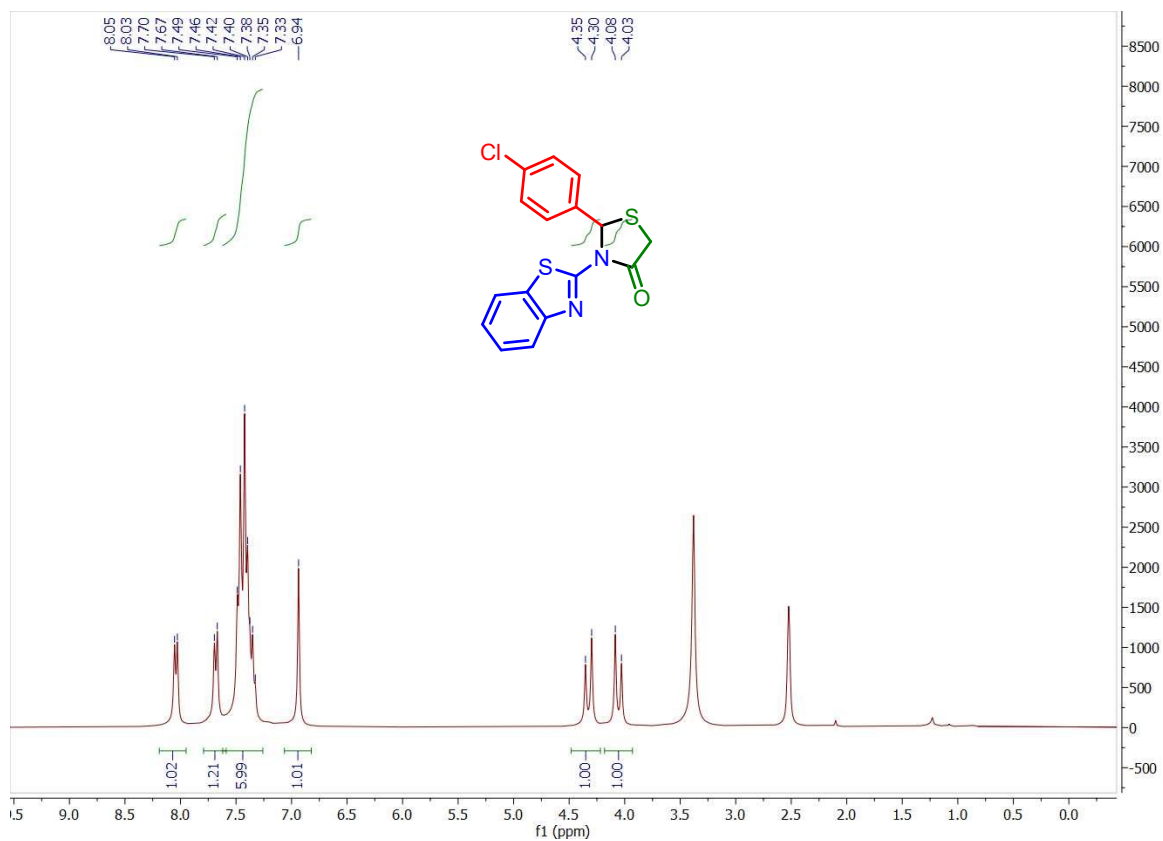

9:  $^{13}\text{C}$  NMR spectrum of 3-(benzo[d]thiazol-2-yl)-2-(4-chlorophenyl)thiazolidin-4-one.

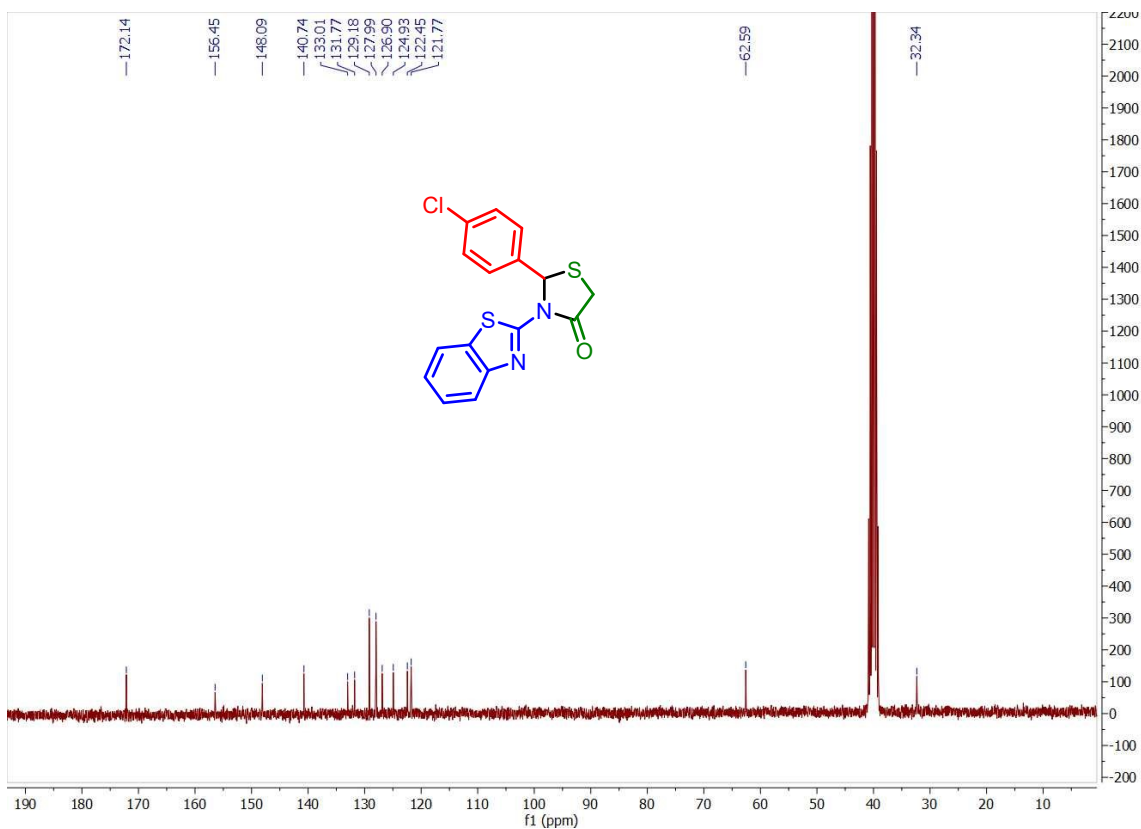

10: FT-IR spectrum of 3-(benzo[d]thiazol-2-yl)-2-(2-chlorophenyl)thiazolidin-4-one.

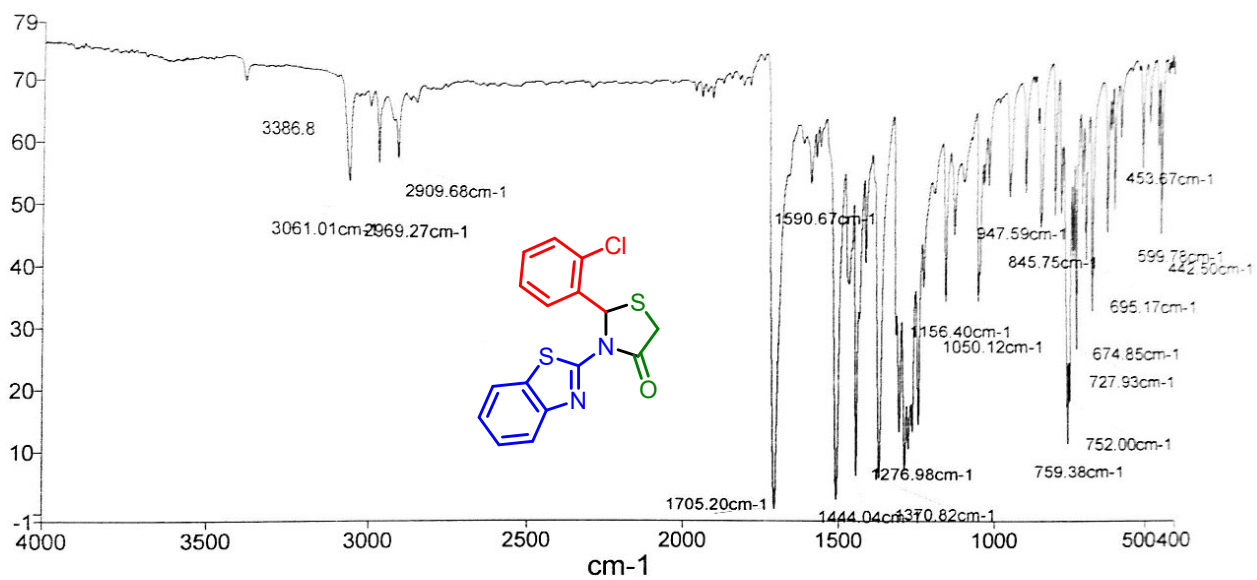

11:  $^1\text{H}$  NMR spectrum of 3-(benzo[d]thiazol-2-yl)-2-(2-chlorophenyl)thiazolidin-4-one.

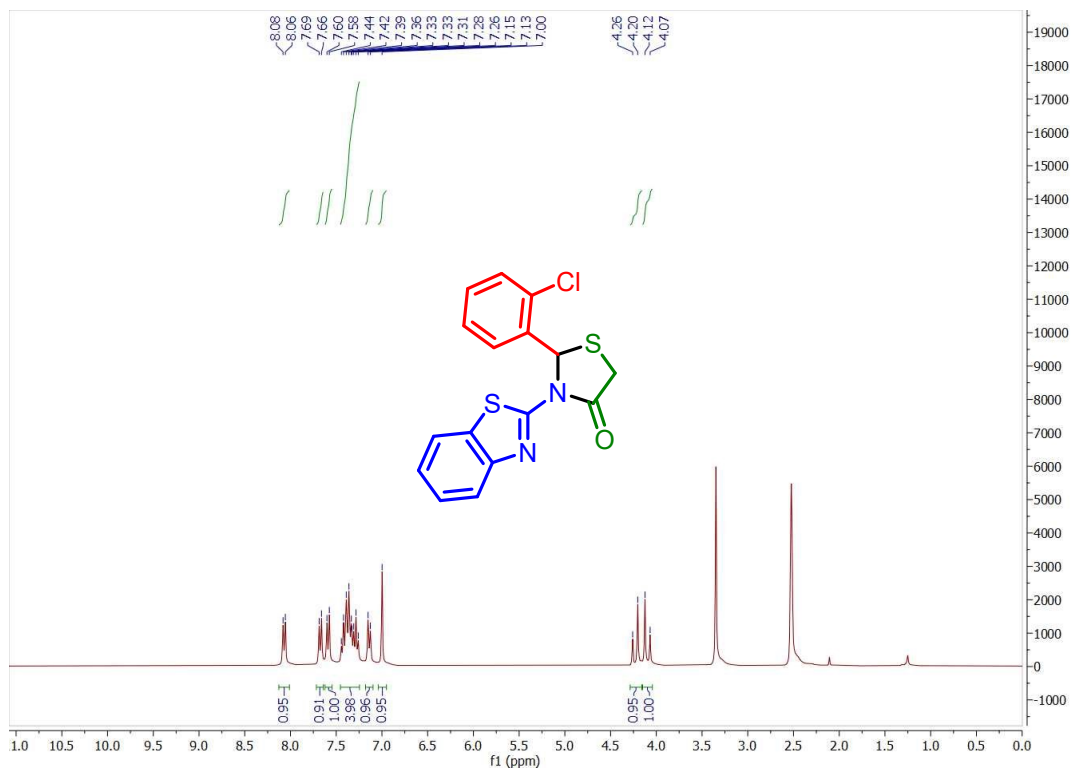

12:  $^{13}\text{C}$  NMR spectrum of 3-(benzo[d]thiazol-2-yl)-2-(2-chlorophenyl)thiazolidin-4-one.

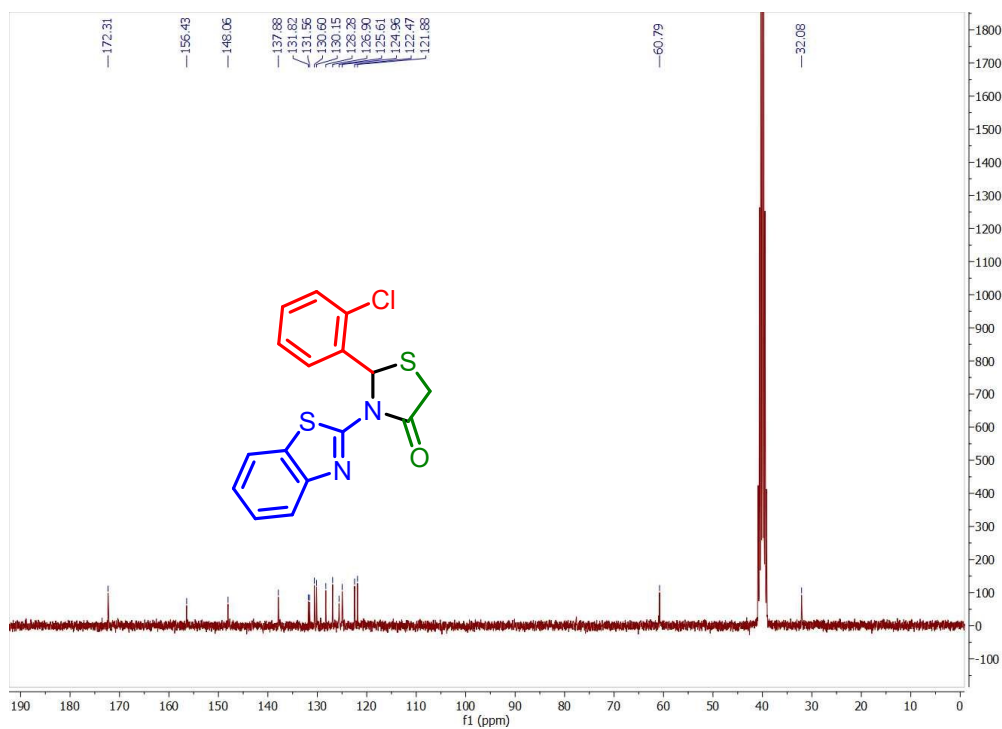



13: FT-IR spectrum of 3-(benzo[d]thiazol-2-yl)-2-(4-bromophenyl)thiazolidin-4-one.

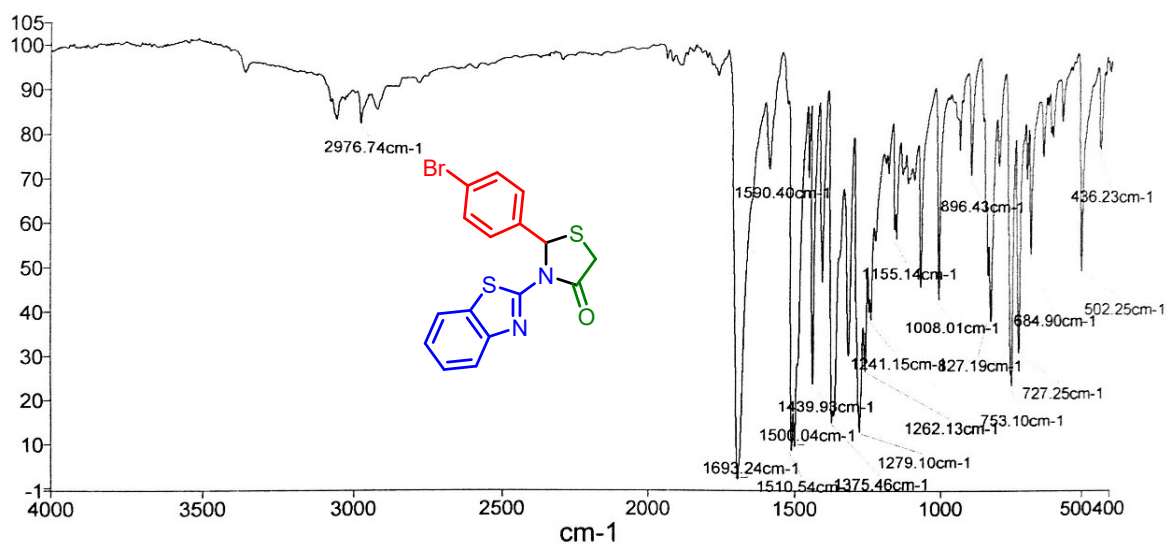

14: FT-IR spectrum of 3-(benzo[d]thiazol-2-yl)-2-(4-nitrophenyl)thiazolidin-4-one.

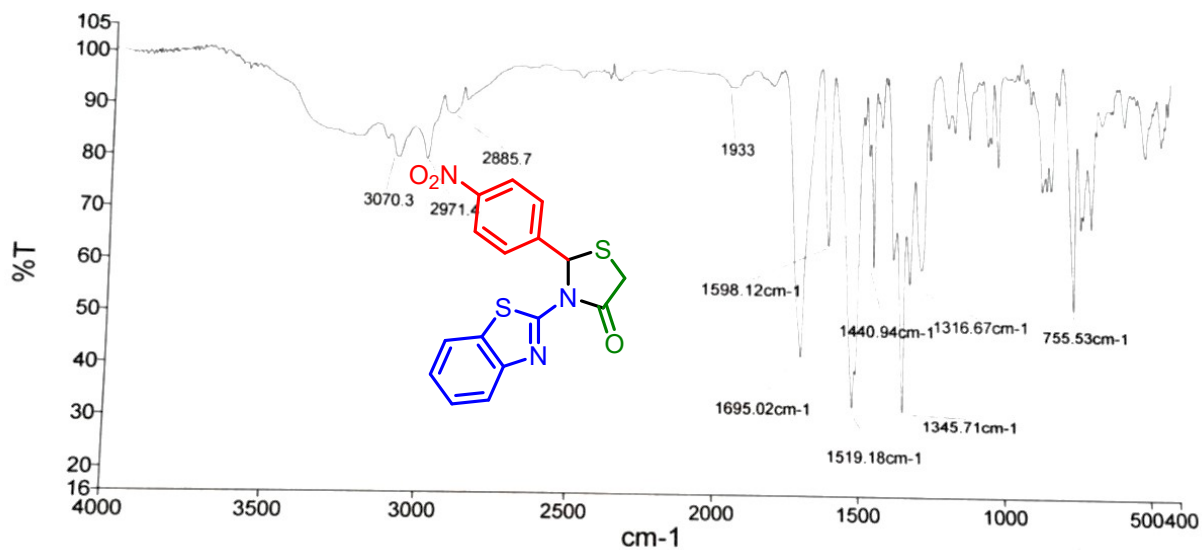

15: FT-IR spectrum of 3-(benzo[d]thiazol-2-yl)-2-(p-tolyl)thiazolidin-4-one.

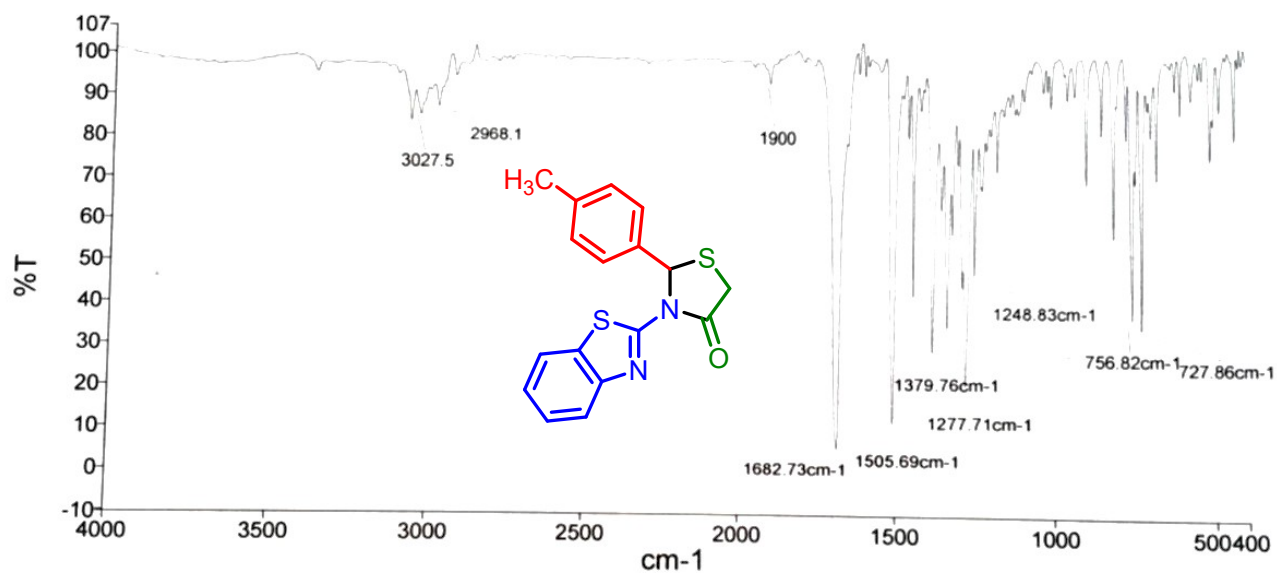

16: FT-IR spectrum of 3-(benzo[d]thiazol-2-yl)-2-(2-hydroxyphenyl)thiazolidin-4-one.

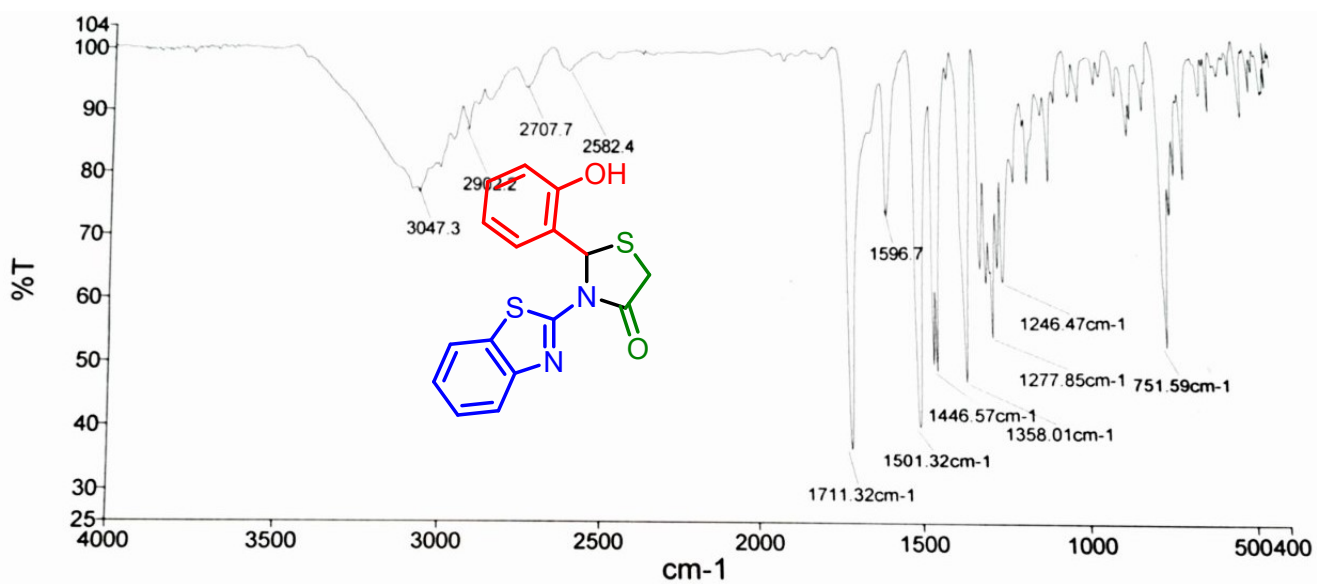

17: FT-IR spectrum of 3,3'-(1,4-phenylene)bis(2-phenylthiazolidin-4-one).

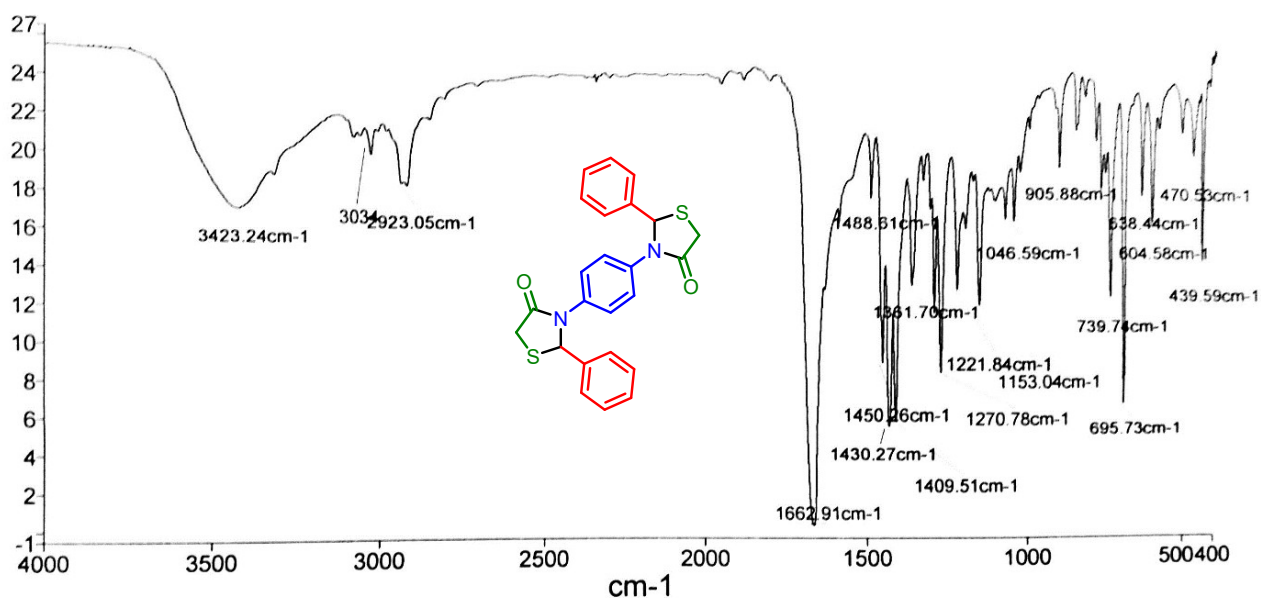

18: FT-IR spectrum of 3,3'-(ethane-1,2-diyl)bis(2-phenylthiazolidin-4-one).

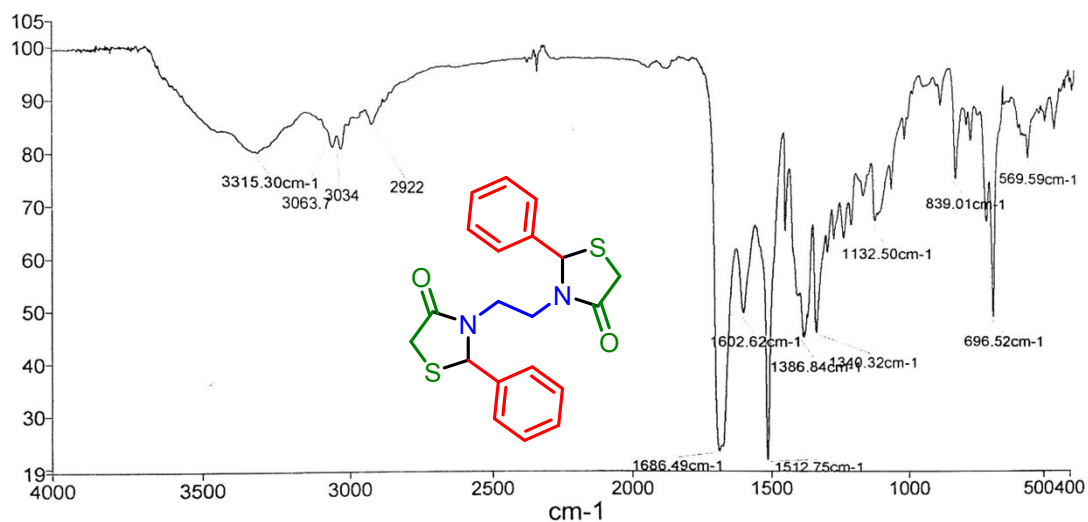

19:  $^1\text{H}$  NMR spectrum of 3,3'-(ethane-1,2-diyl)bis(2-phenylthiazolidin-4-one).

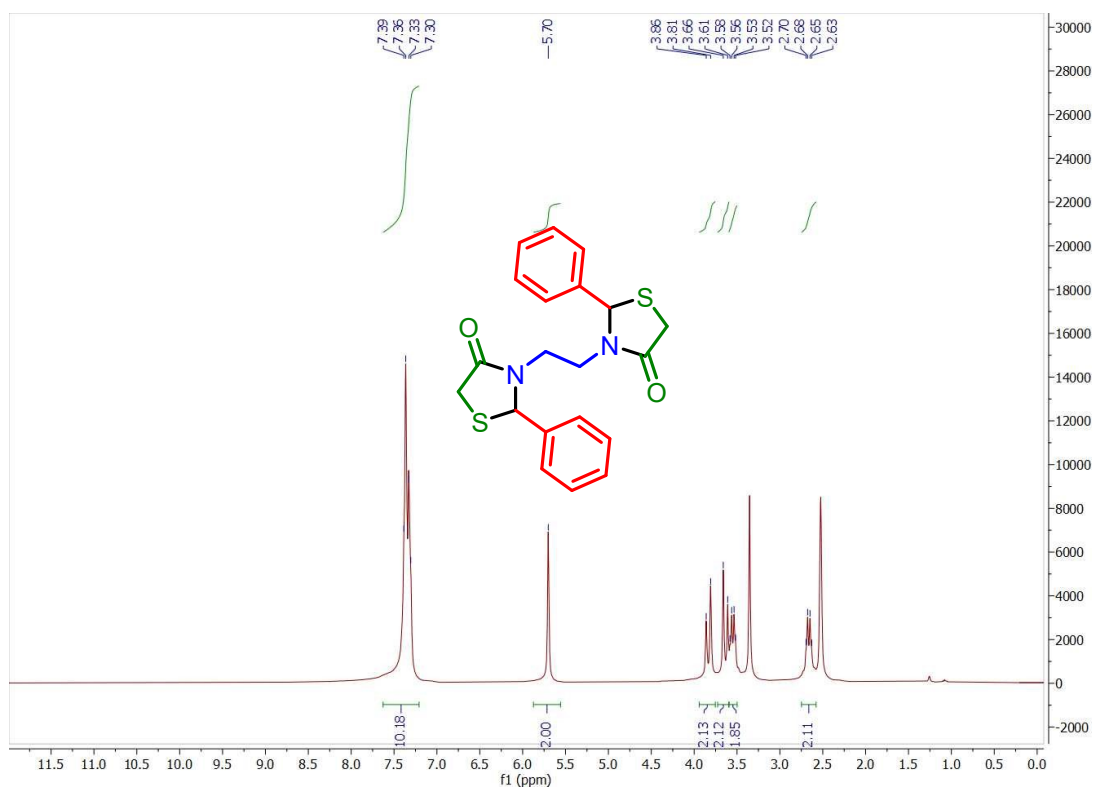

20:  $^{13}\text{C}$  NMR spectrum of 3,3'-(ethane-1,2-diyl)bis(2-phenylthiazolidin-4-one).

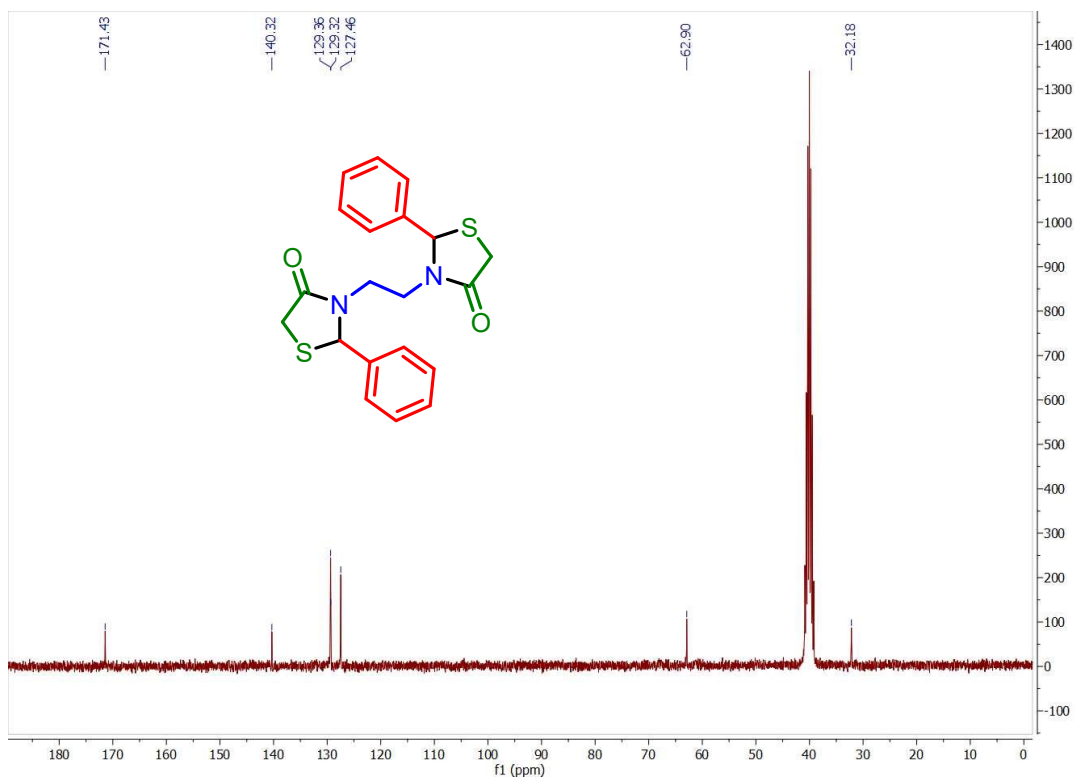

21: FT-IR spectrum of 3,3'-(ethane-1,2-diyl)bis(2-(4-chlorophenyl)thiazolidin-4-one).

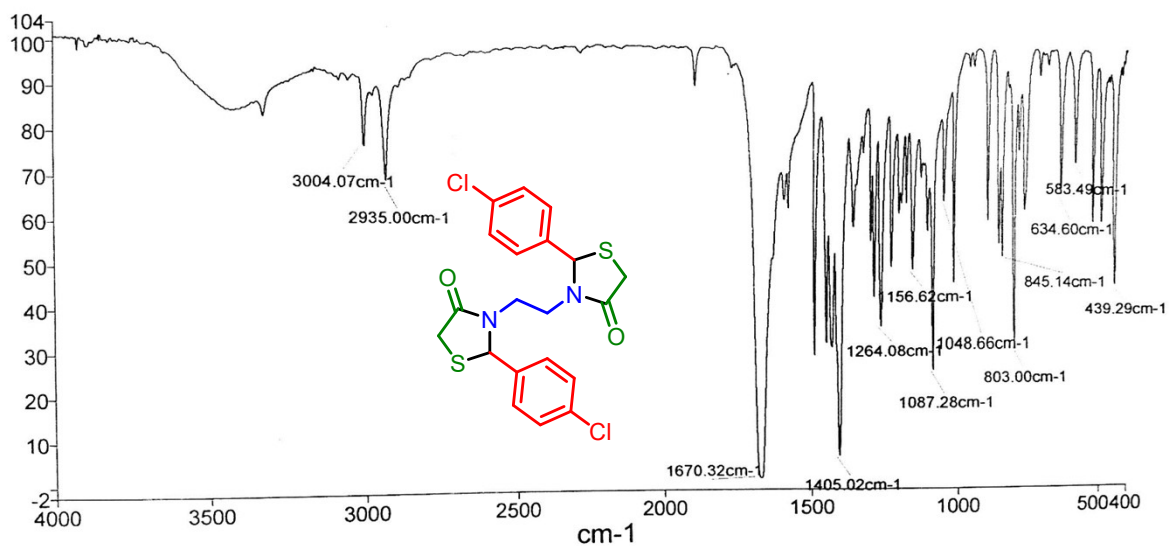

22: FT-IR spectrum of 3,3'-(ethane-1,2-diyl)bis(2-(4-methylphenyl)thiazolidin-4-one).

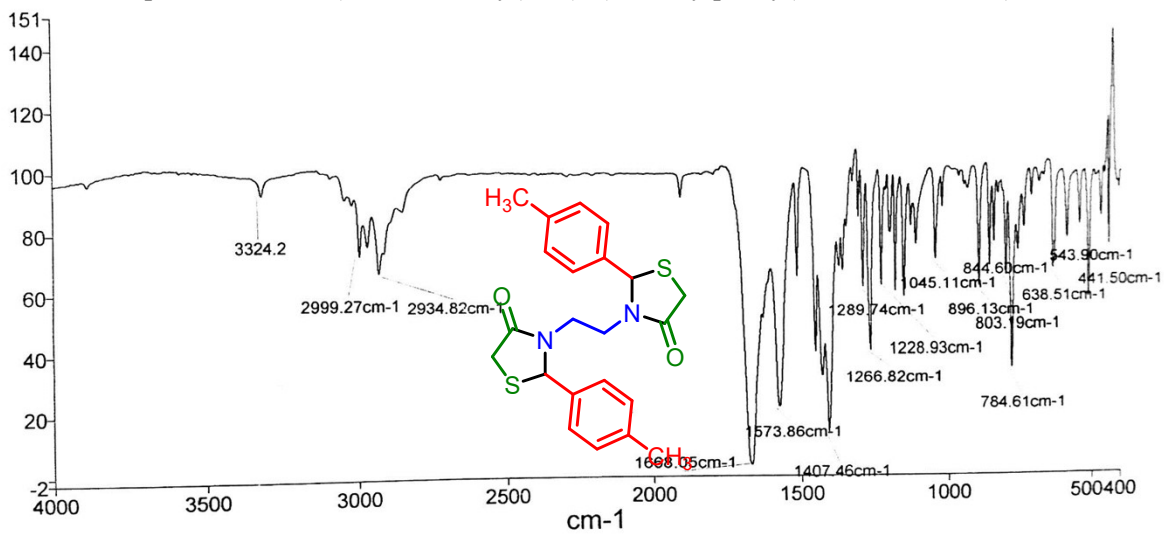

23:  $^1\text{H}$  NMR spectrum of 3,3'-(ethane-1,2-diyl)bis(2-(4-methylphenyl)thiazolidin-4-one).

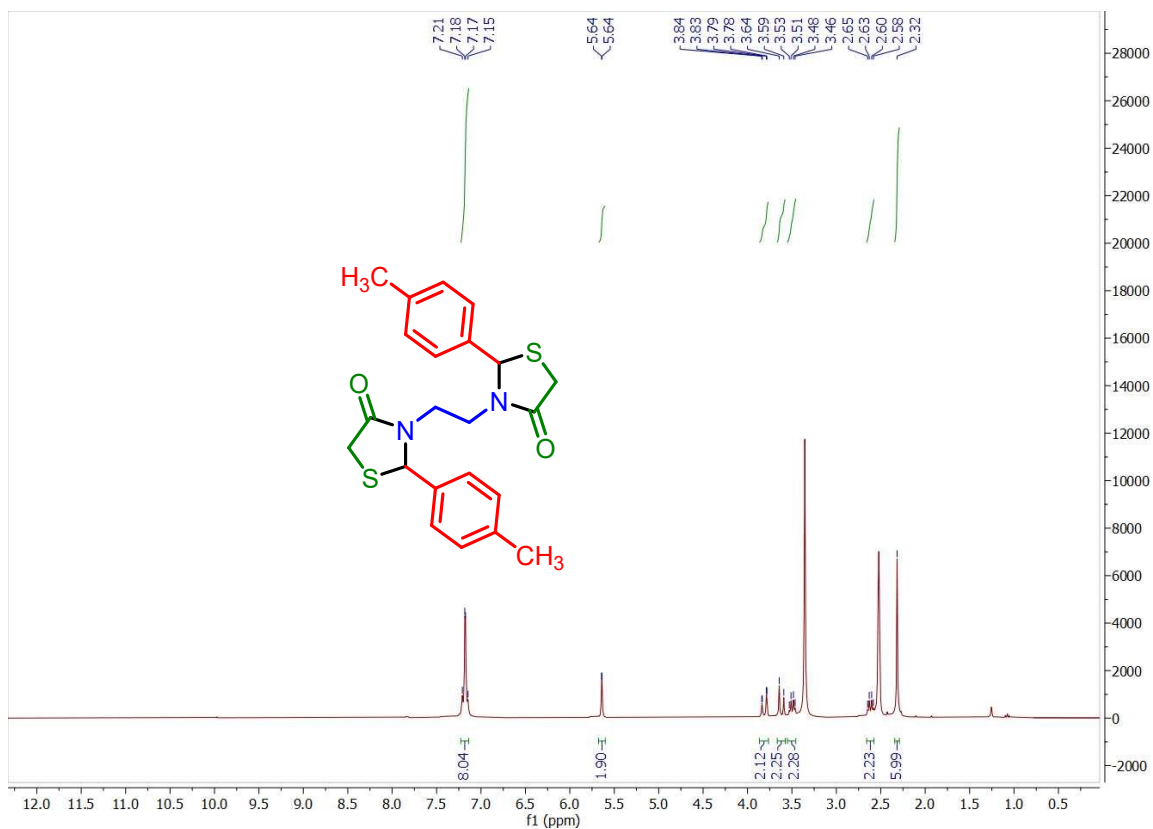

24:  $^{13}\text{C}$  NMR spectrum of 3,3'-(ethane-1,2-diyl)bis(2-(*p*-tolyl)phenyl)thiazolidin-4-one).

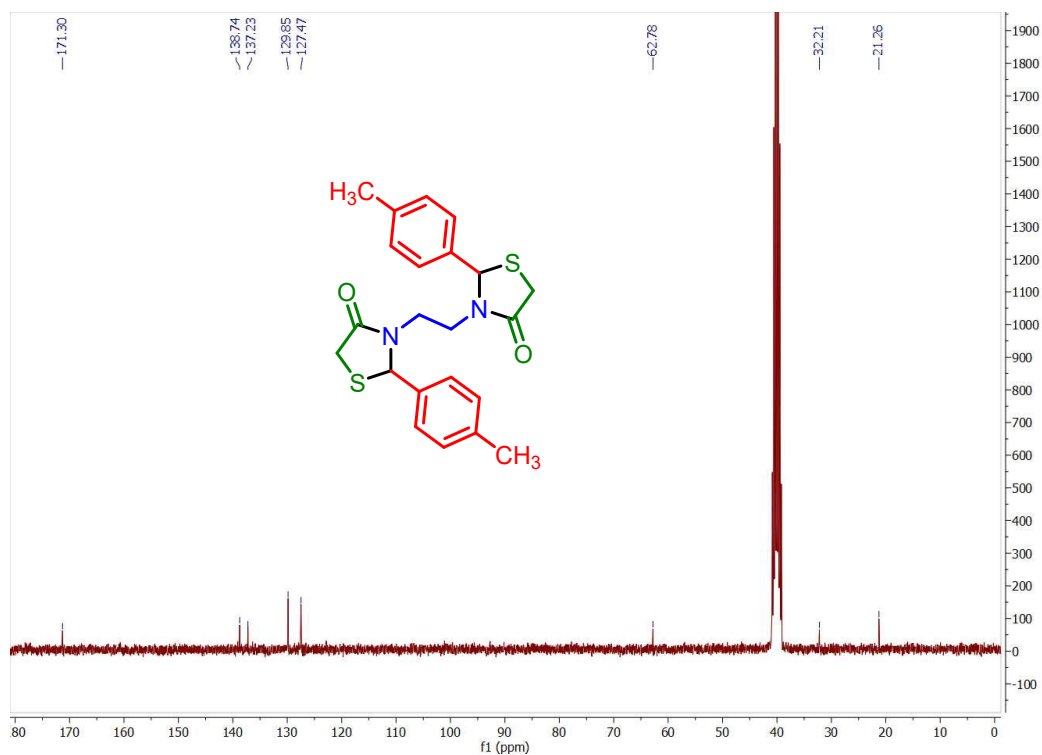

25: FT-IR spectrum of ethyl 2,7,7-trimethyl-5-oxo-4-phenyl-1,4,5,6,7,8-hexahydroquinoline-3-carboxylate.

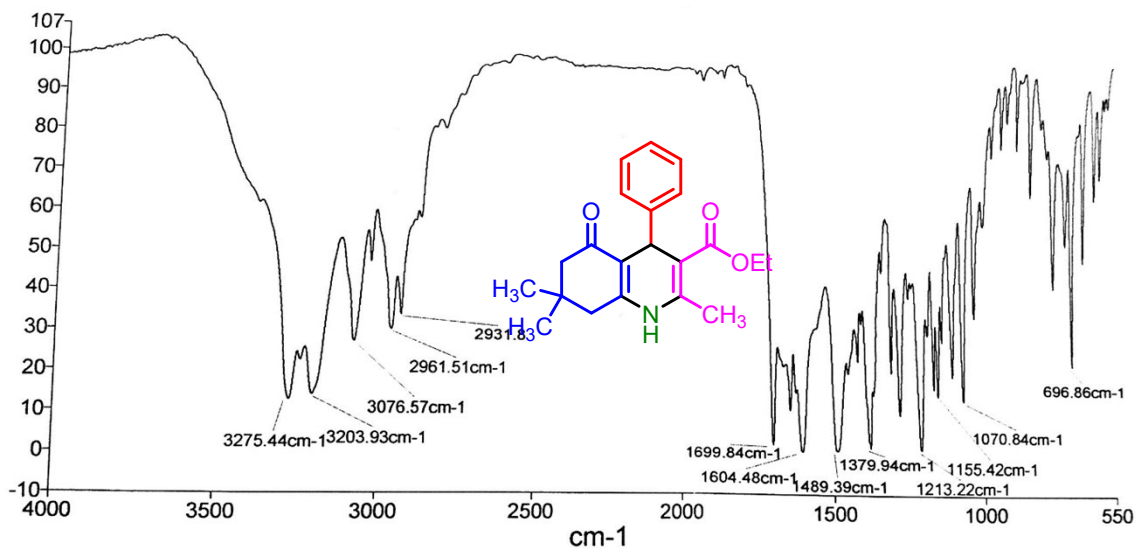

26: <sup>1</sup>H NMR spectrum of 2,7,7-trimethyl-5-oxo-4-phenyl-1,4,5,6,7,8-hexahydroquinoline-3-carboxylate.

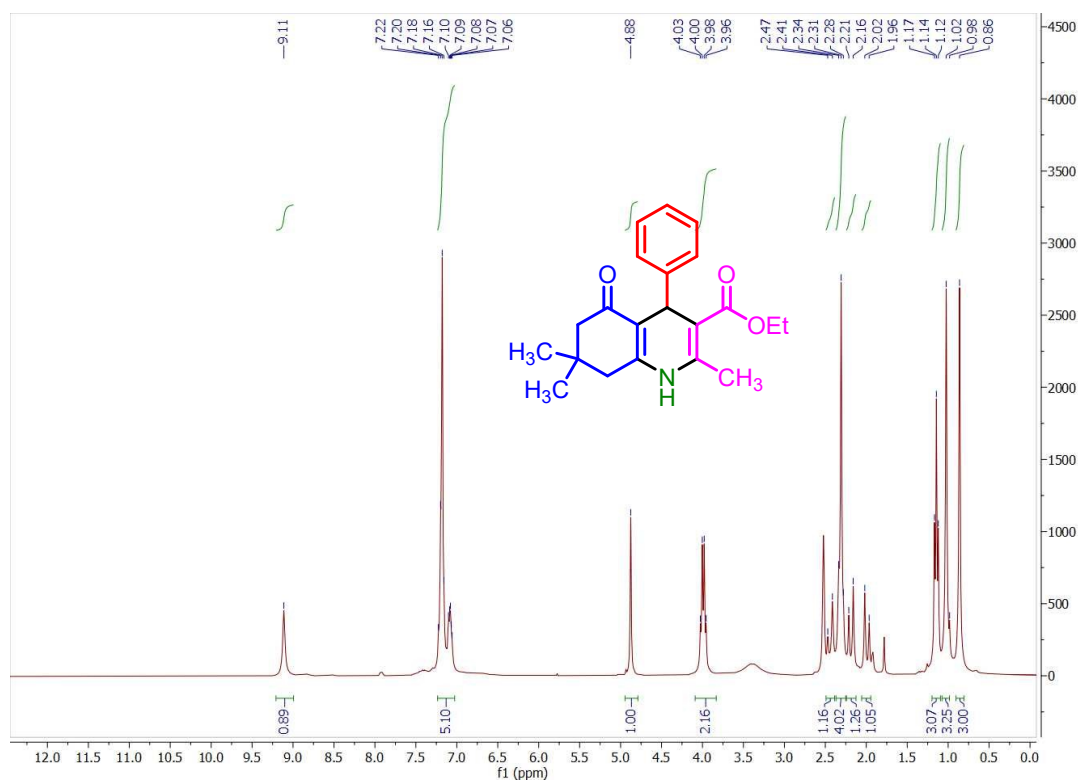

27:  $^{13}\text{C}$  NMR spectrum of 2,7,7-trimethyl-5-oxo-4-phenyl-1,4,5,6,7,8-hexahydroquinoline-3-carboxylate.

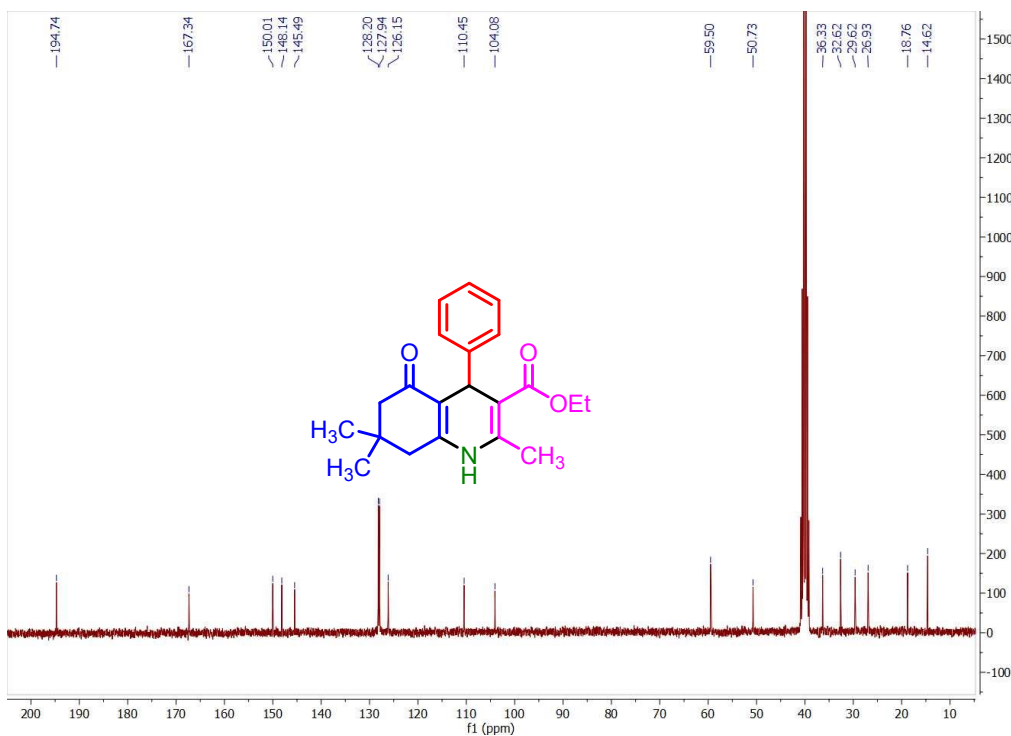

28: FT-IR spectrum of ethyl 2,7,7-trimethyl-5-oxo-4-(*p*-tolyl)-1,4,5,6,7,8-hexahydroquinoline-3-carboxylate.

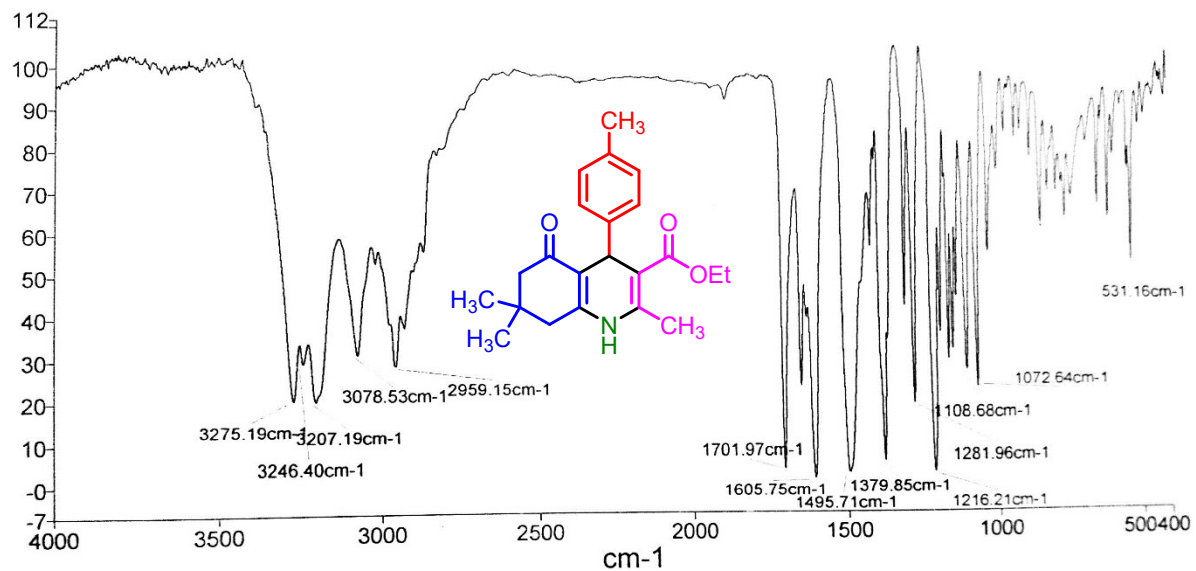



29: FT-IR spectrum of ethyl 4-(4-hydroxyphenyl)-2,7,7-trimethyl-5-oxo-1,4,5,6,7,8-hexahydroquinoline-3-carboxylate.

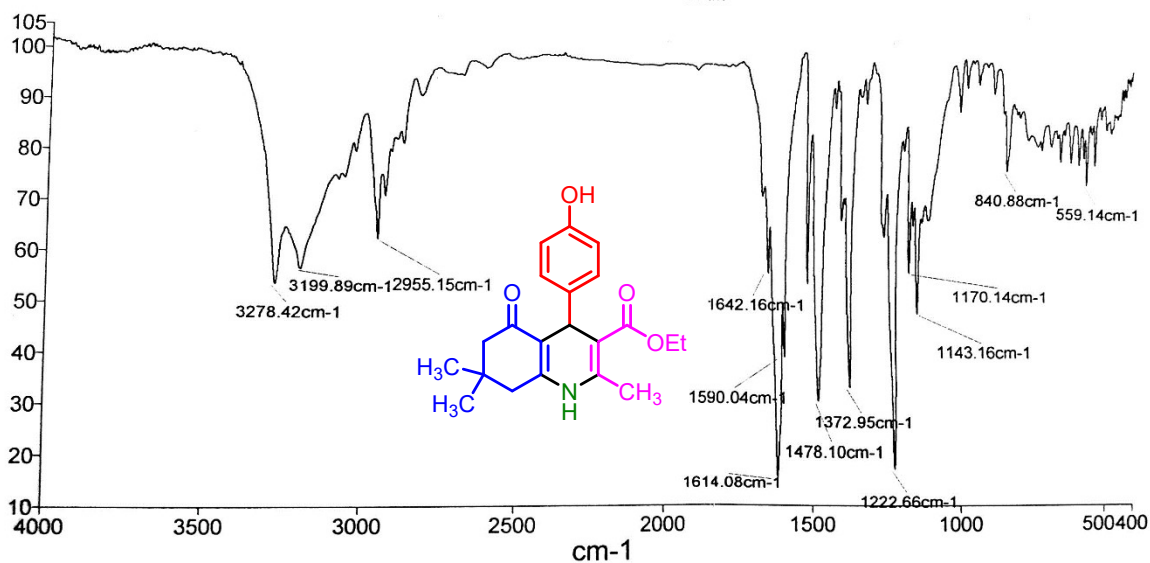

30: FT-IR spectrum of ethyl 4-(3-hydroxyphenyl)-2,7,7-trimethyl-5-oxo-1,4,5,6,7,8-hexahydroquinoline-3-carboxylate.

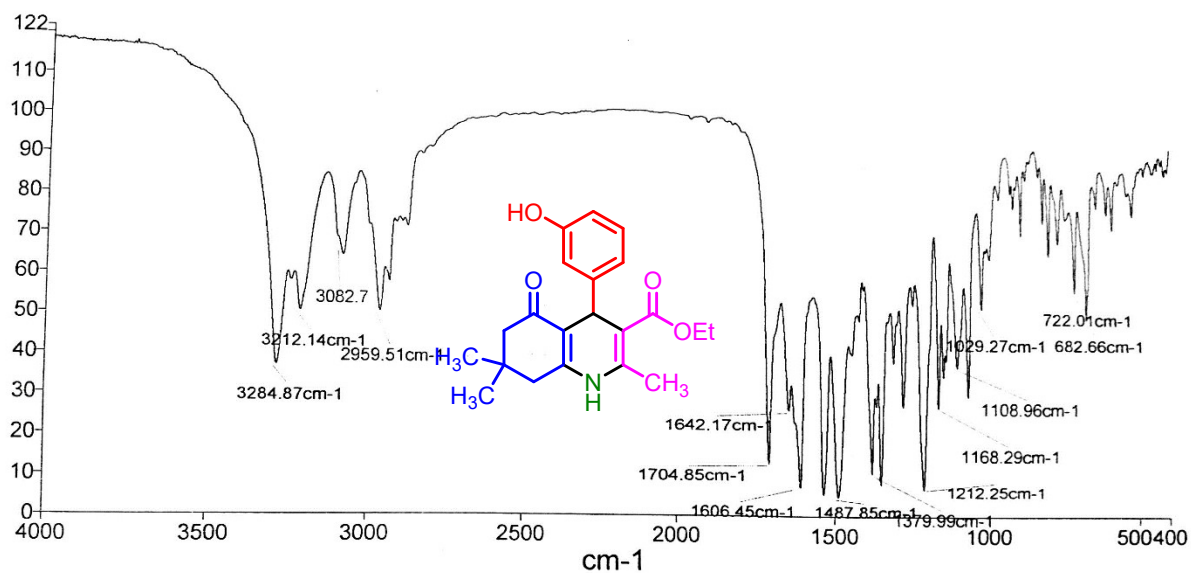

31: FT-IR spectrum of ethyl 4-(4-methoxyphenyl)-2,7,7-trimethyl-5-oxo-1,4,5,6,7,8-hexahydroquinoline-3-carboxylate.

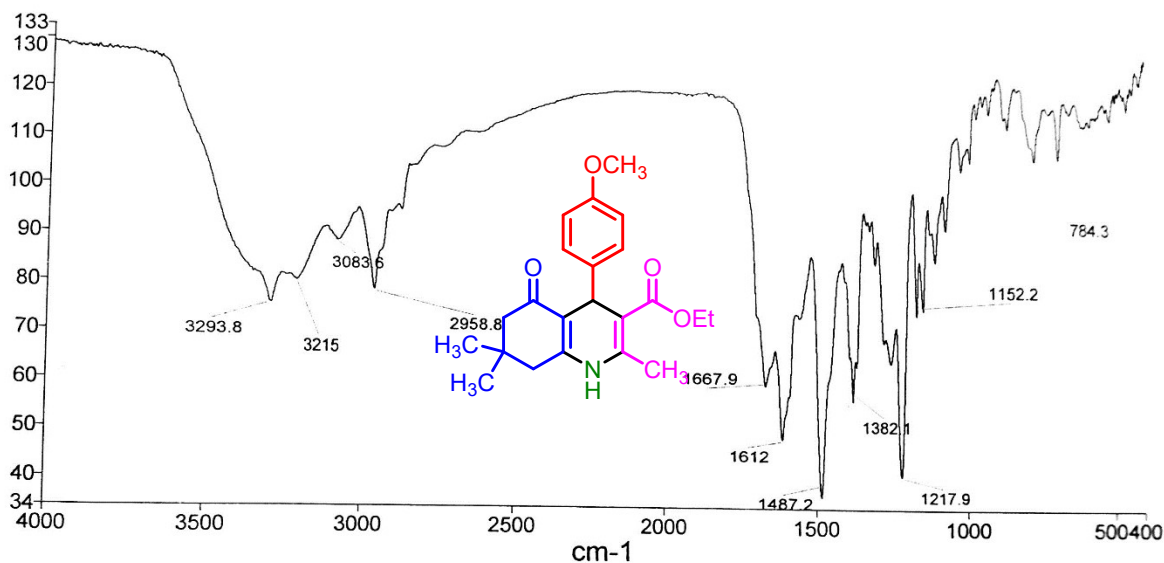

32: <sup>1</sup>H NMR spectrum of ethyl 4-(4-methoxyphenyl)-2,7,7-trimethyl-5-oxo-1,4,5,6,7,8-hexahydroquinoline-3-carboxylate.

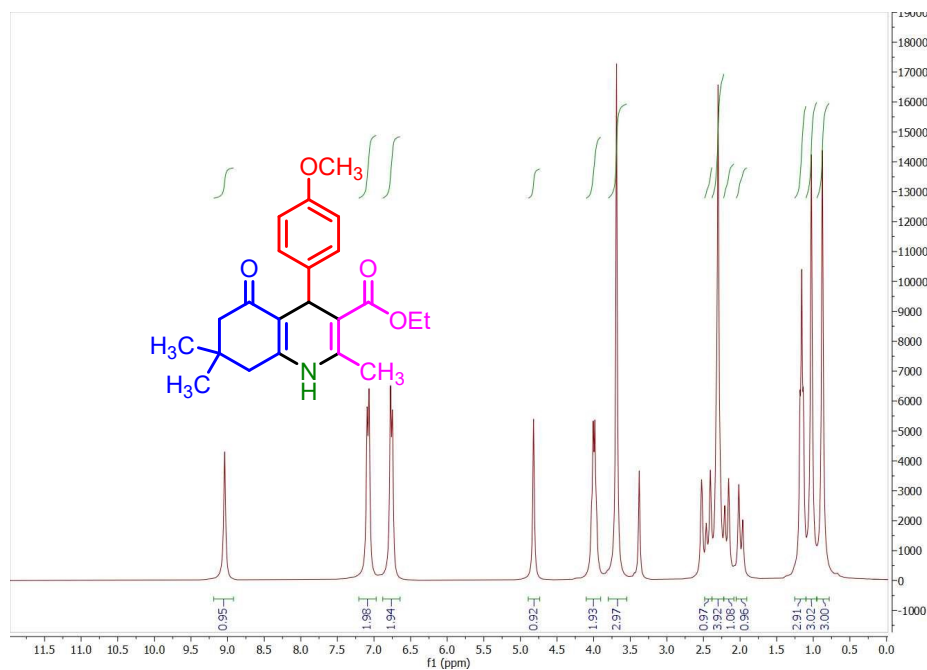

33:  $^{13}\text{C}$  NMR spectrum of ethyl 4-(4-methoxyphenyl)-2,7,7-trimethyl-5-oxo-1,4,5,6,7,8-hexahydroquinoline-3-carboxylate.

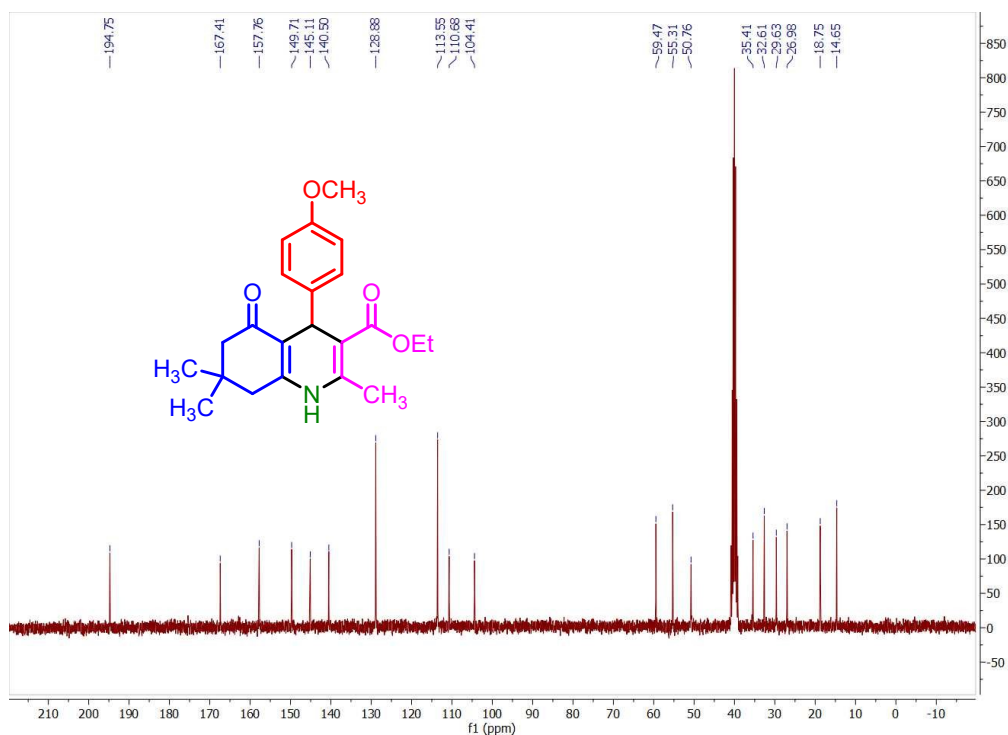

34:  $^1\text{H}$  NMR spectrum of ethyl 4-(4-chlorophenyl)-2,7,7-trimethyl-5-oxo-1,4,5,6,7,8-hexahydroquinoline-3-carboxylate.

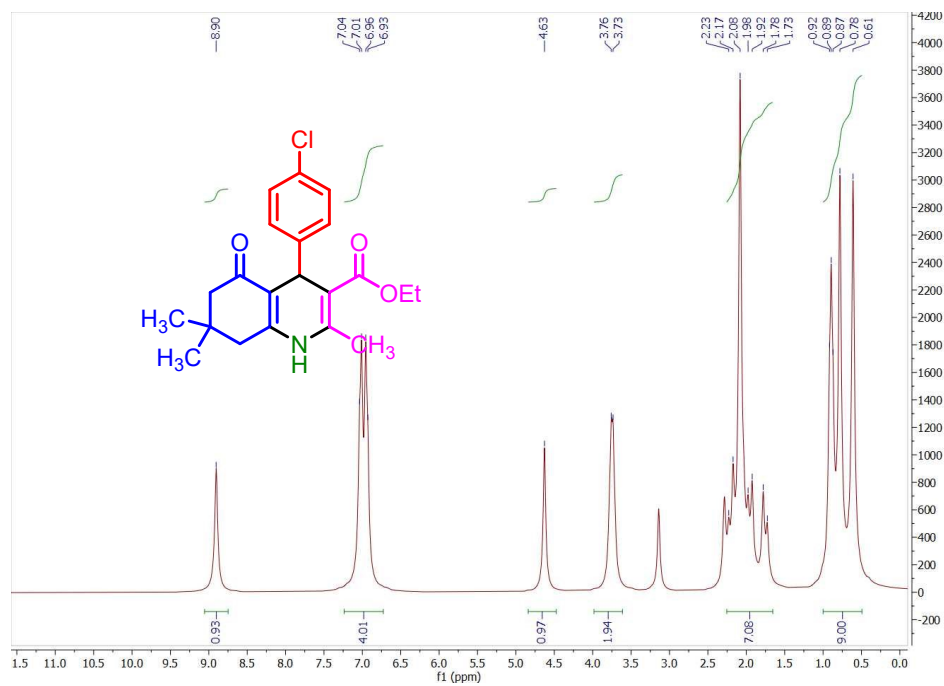

35:  $^{13}\text{C}$  NMR spectrum of 4-(4-chlorophenyl)-2,7,7-trimethyl-5-oxo-1,4,5,6,7,8-hexahydroquinoline-3-carboxylate.

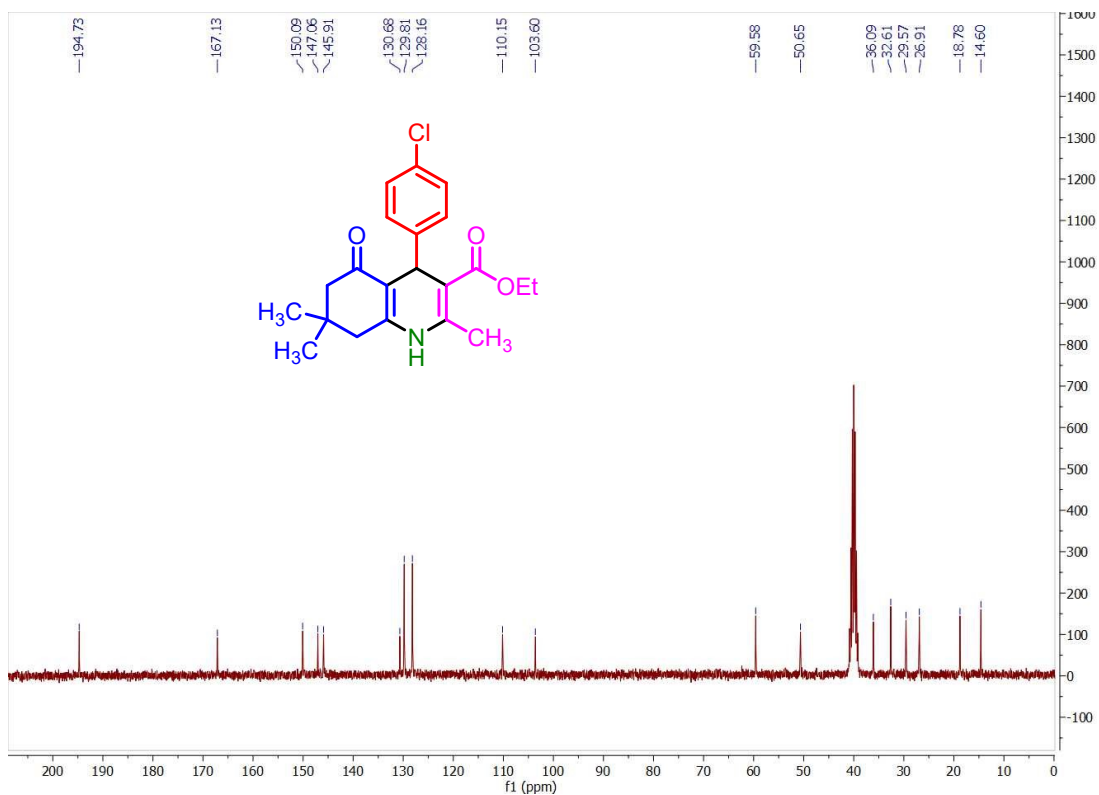

36: FT-IR spectrum of 4-(2-chlorophenyl)-2,7,7-trimethyl-5-oxo-1,4,5,6,7,8-hexahydroquinoline-3-carboxylate.

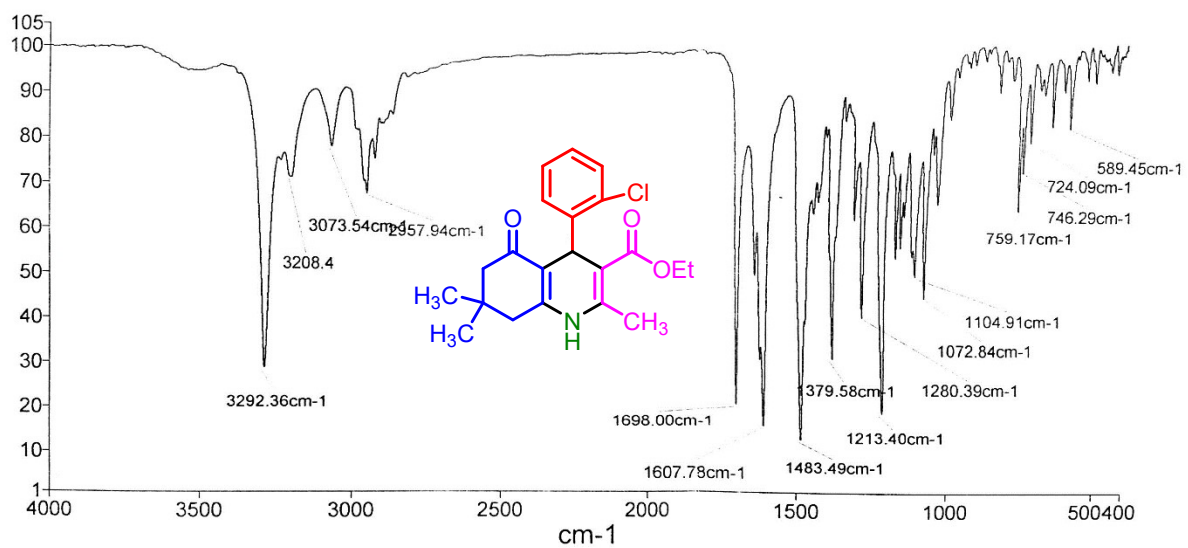

37: FT-IR spectrum of ethyl 4-(2,4-dichlorophenyl)-2,7,7-trimethyl-5-oxo-1,4,5,6,7,8-hexahydroquinoline-3-carboxylate.

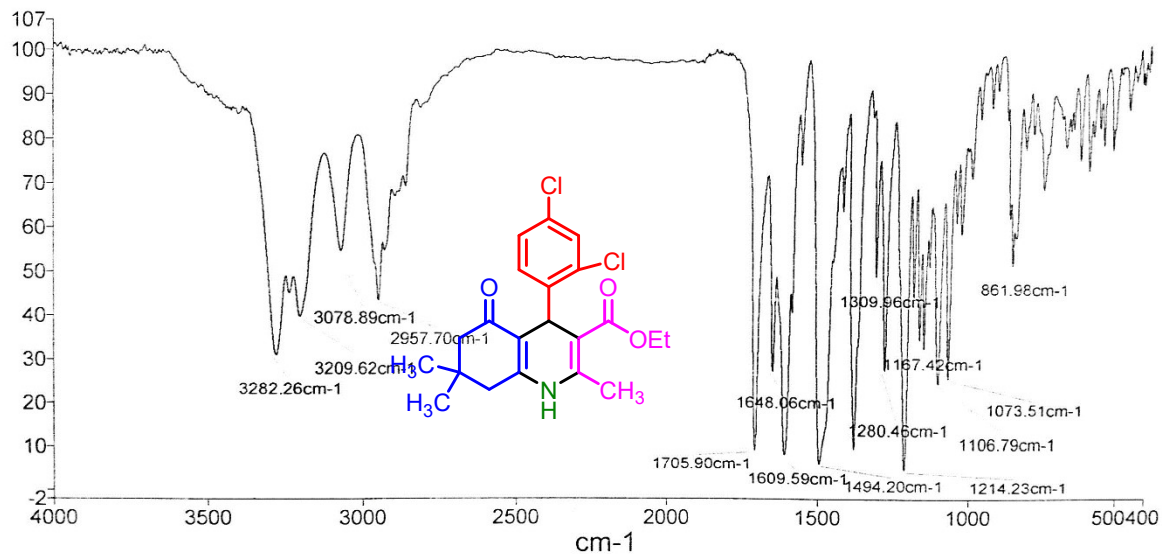

38: FT-IR spectrum of ethyl 2,7,7-trimethyl-5-oxo-4-(thiophen-2-yl)-1,4,5,6,7,8-hexahydroquinoline-3-carboxylate.

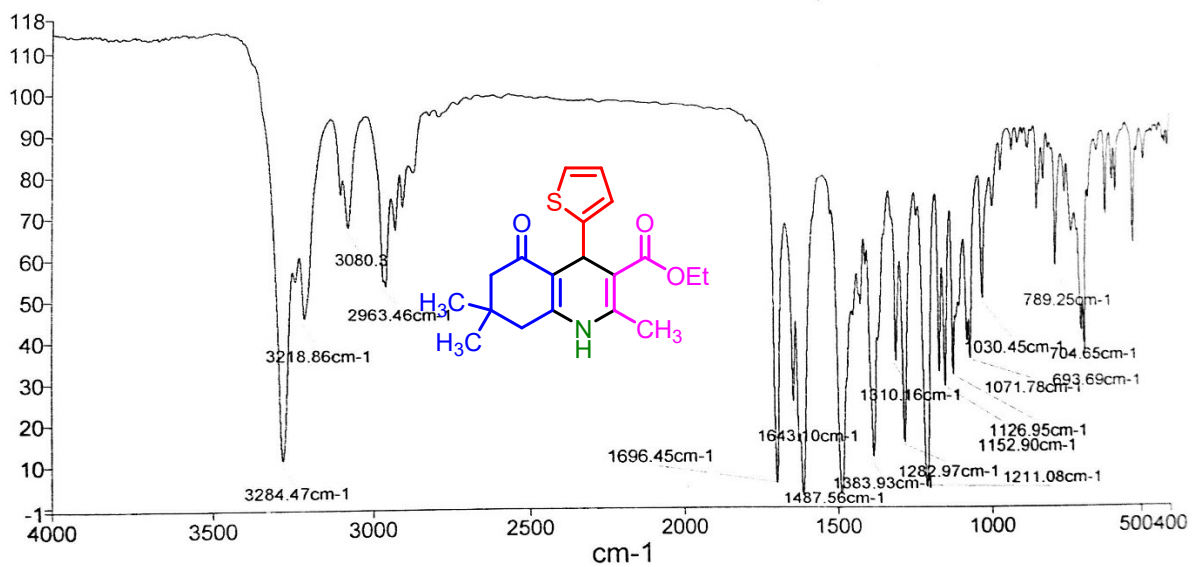

39: FT-IR spectrum of 4-(4-nitrophenyl)-2,7,7-trimethyl-5-oxo-1,4,5,6,7,8-hexahydroquinoline-3-carboxylate.

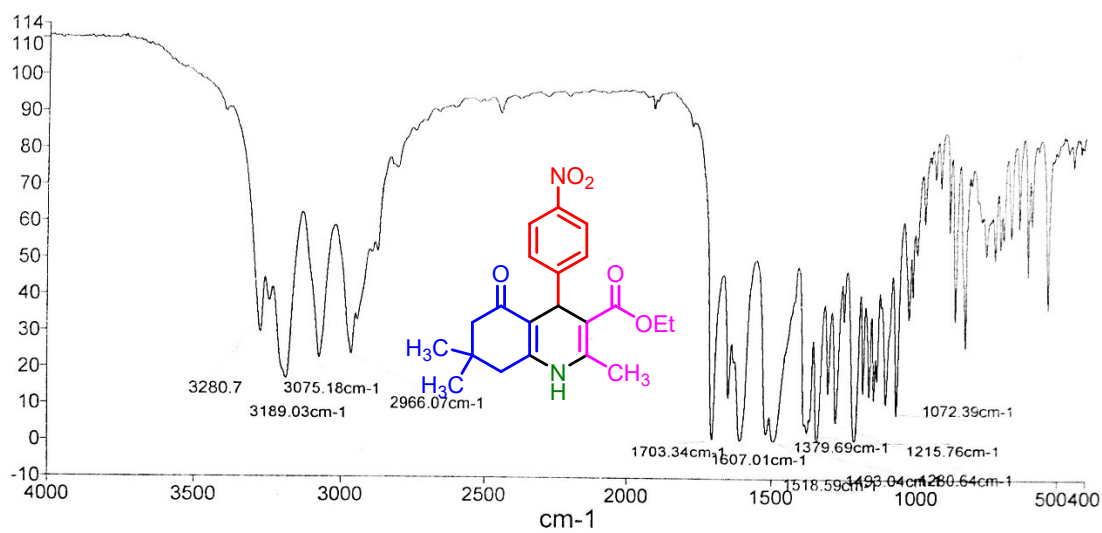

Supplement: d2ra02205b1.pdf [file d2ra02205b1.pdf]
